# Supplementary material
Source: PubMed Central journal article supplement (PMC4205620)
Supplement: pnas.1408975111.sapp.pdf [file pnas.1408975111.sapp.pdf]

## Supporting Information (SI)

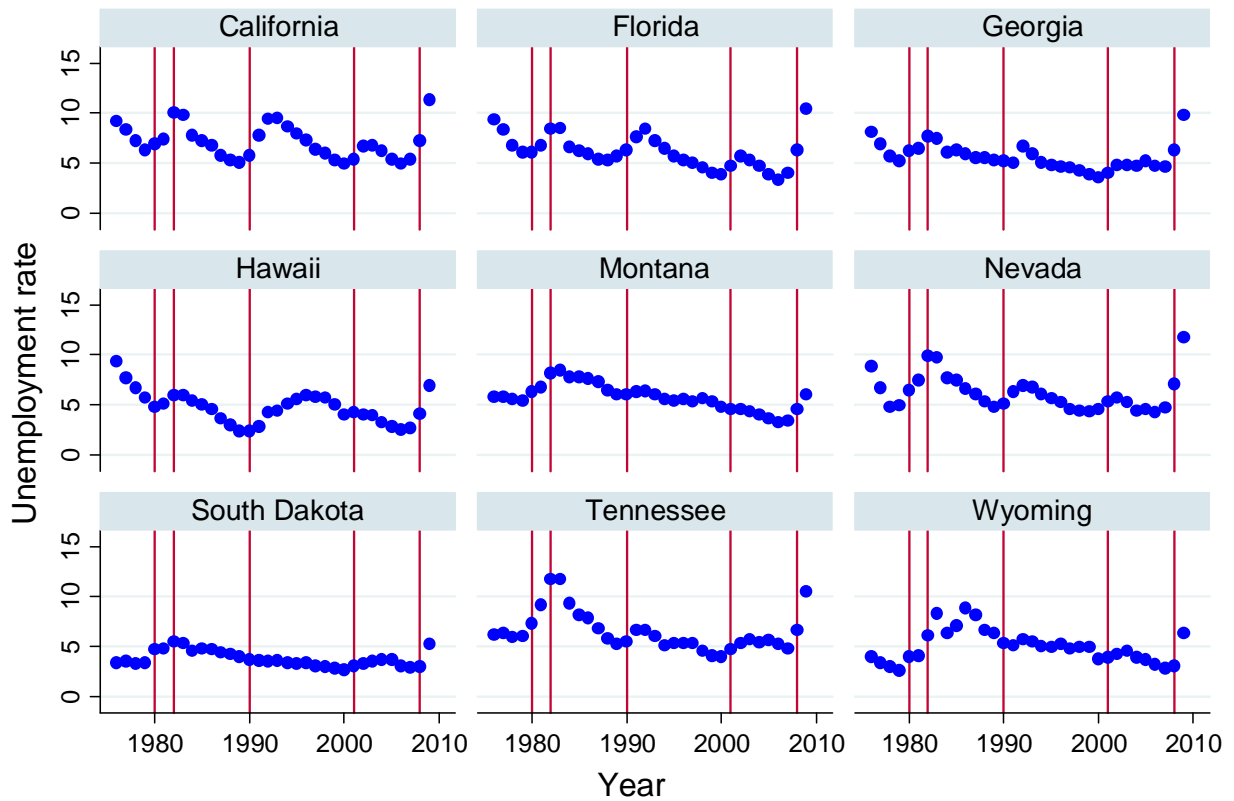

**Fig. S1: Variation in unemployment rates over time in nine example states.** Monthly unemployment rates are plotted for nine states. Red vertical lines indicate the starts of recessions in 1980, 1981, 1990, 2001, and 2008.

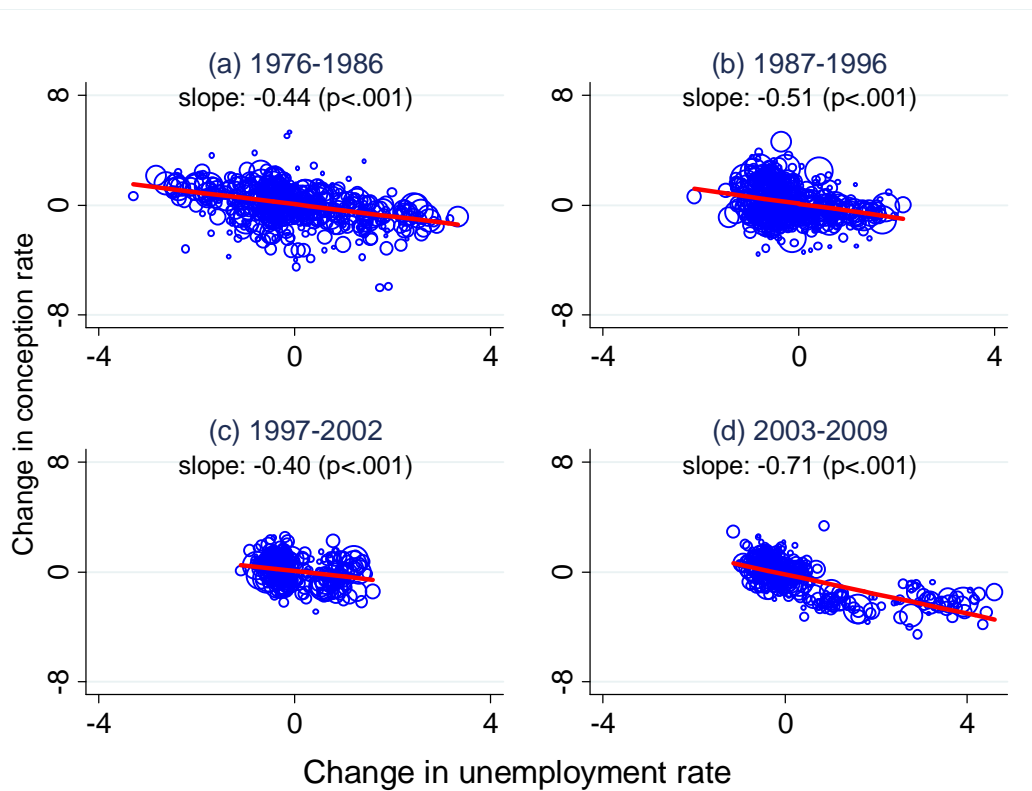

**Fig. S2: Short-term fertility responses across four recession periods (US born women).** Plotted are changes in the conception rate against changes in the unemployment rate at the state-year level. Four time periods are chosen to include distinct recession periods. See Fig. S1 for the timing of each recession. Straight lines are fitted using OLS. Observations are weighted by state size.

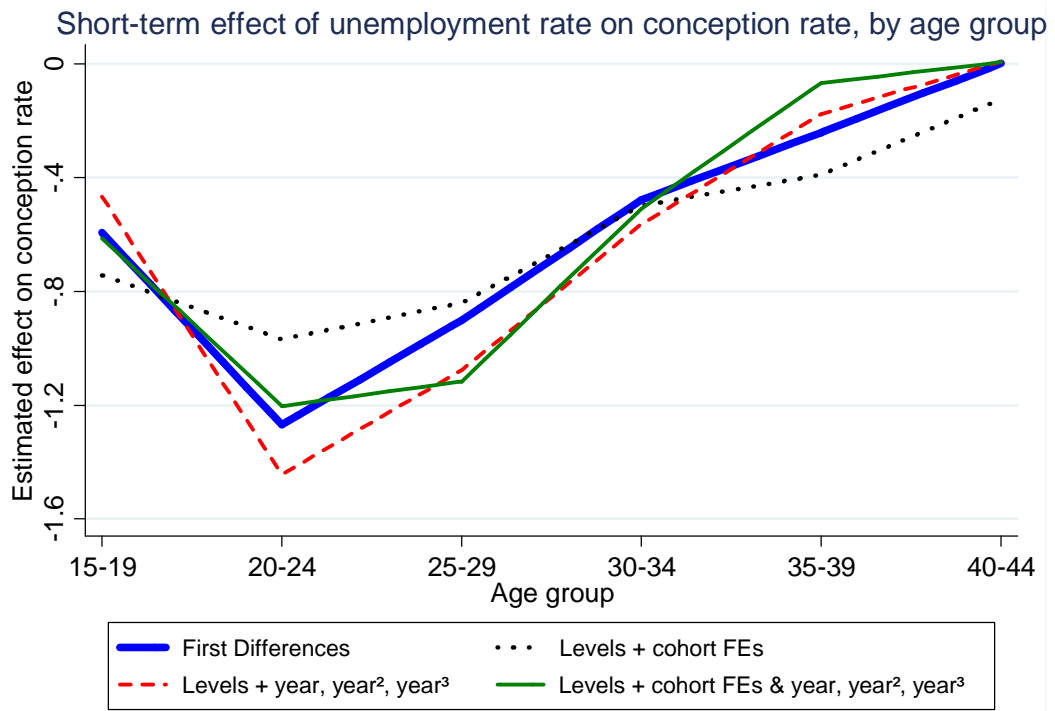

**Fig. S3: Short-term effect of the unemployment rate on the conception rates by age group, estimated with different econometric specifications.** Coefficients are estimated in separate regressions for each age group. These estimates are connected across age groups for a given econometric specification. Regression results are shown in Table S1 (B) for the first difference specification and in Table S2 for the levels specifications.

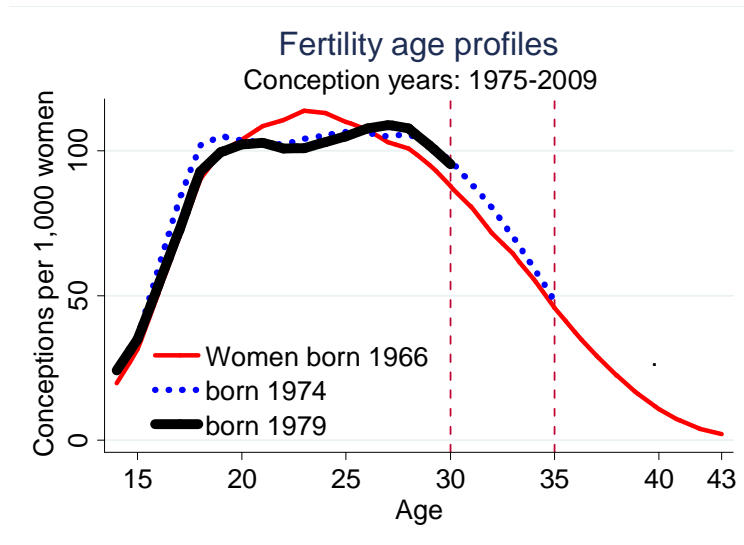

**Fig. S4: Fertility age profiles for different birth cohorts of women.** Annual conception rates are plotted by age for three example birth cohorts. The available calendar years for which we observe conceptions limit the age up to which different cohorts can be followed.

|                       |    | CALENDAR YEAR (YEAR OF CONCEPTION) |    |    |    |    |    |    |    |    |    |    |    |    |    |    |    |    |    |    |    |    |    |    |    |    |    |    |    |    |    |    |    |    |    |
|-----------------------|----|------------------------------------|----|----|----|----|----|----|----|----|----|----|----|----|----|----|----|----|----|----|----|----|----|----|----|----|----|----|----|----|----|----|----|----|----|
|                       |    | 76                                 | 77 | 78 | 79 | 80 | 81 | 82 | 83 | 84 | 85 | 86 | 87 | 88 | 89 | 90 | 91 | 92 | 93 | 94 | 95 | 96 | 97 | 98 | 99 | 0  | 1  | 2  | 3  | 4  | 5  | 6  | 7  | 8  | 9  |
| WOMEN'S YEAR OF BIRTH | 60 | 16                                 | 17 | 18 | 19 | 20 | 21 | 22 | 23 | 24 | 25 | 26 | 27 | 28 | 29 | 30 | 31 | 32 | 33 | 34 | 35 | 36 | 37 | 38 | 39 | 40 | 41 | 42 | 43 | 44 | 45 | 46 | 47 | 48 | 49 |
|                       | 61 | 15                                 | 16 | 17 | 18 | 19 | 20 | 21 | 22 | 23 | 24 | 25 | 26 | 27 | 28 | 29 | 30 | 31 | 32 | 33 | 34 | 35 | 36 | 37 | 38 | 39 | 40 | 41 | 42 | 43 | 44 | 45 | 46 | 47 | 48 |
|                       | 62 | 14                                 | 15 | 16 | 17 | 18 | 19 | 20 | 21 | 22 | 23 | 24 | 25 | 26 | 27 | 28 | 29 | 30 | 31 | 32 | 33 | 34 | 35 | 36 | 37 | 38 | 39 | 40 | 41 | 42 | 43 | 44 | 45 | 46 | 47 |
|                       | 63 | 13                                 | 14 | 15 | 16 | 17 | 18 | 19 | 20 | 21 | 22 | 23 | 24 | 25 | 26 | 27 | 28 | 29 | 30 | 31 | 32 | 33 | 34 | 35 | 36 | 37 | 38 | 39 | 40 | 41 | 42 | 43 | 44 | 45 | 46 |
|                       | 64 | 12                                 | 13 | 14 | 15 | 16 | 17 | 18 | 19 | 20 | 21 | 22 | 23 | 24 | 25 | 26 | 27 | 28 | 29 | 30 | 31 | 32 | 33 | 34 | 35 | 36 | 37 | 38 | 39 | 40 | 41 | 42 | 43 | 44 | 45 |
|                       | 65 | 11                                 | 12 | 13 | 14 | 15 | 16 | 17 | 18 | 19 | 20 | 21 | 22 | 23 | 24 | 25 | 26 | 27 | 28 | 29 | 30 | 31 | 32 | 33 | 34 | 35 | 36 | 37 | 38 | 39 | 40 | 41 | 42 | 43 | 44 |
|                       | 66 | 10                                 | 11 | 12 | 13 | 14 | 15 | 16 | 17 | 18 | 19 | 20 | 21 | 22 | 23 | 24 | 25 | 26 | 27 | 28 | 29 | 30 | 31 | 32 | 33 | 34 | 35 | 36 | 37 | 38 | 39 | 40 | 41 | 42 | 43 |
|                       | 67 | 9                                  | 10 | 11 | 12 | 13 | 14 | 15 | 16 | 17 | 18 | 19 | 20 | 21 | 22 | 23 | 24 | 25 | 26 | 27 | 28 | 29 | 30 | 31 | 32 | 33 | 34 | 35 | 36 | 37 | 38 | 39 | 40 | 41 | 42 |
|                       | 68 | 8                                  | 9  | 10 | 11 | 12 | 13 | 14 | 15 | 16 | 17 | 18 | 19 | 20 | 21 | 22 | 23 | 24 | 25 | 26 | 27 | 28 | 29 | 30 | 31 | 32 | 33 | 34 | 35 | 36 | 37 | 38 | 39 | 40 | 41 |
|                       | 69 | 7                                  | 8  | 9  | 10 | 11 | 12 | 13 | 14 | 15 | 16 | 17 | 18 | 19 | 20 | 21 | 22 | 23 | 24 | 25 | 26 | 27 | 28 | 29 | 30 | 31 | 32 | 33 | 34 | 35 | 36 | 37 | 38 | 39 | 40 |
|                       | 70 | 6                                  | 7  | 8  | 9  | 10 | 11 | 12 | 13 | 14 | 15 | 16 | 17 | 18 | 19 | 20 | 21 | 22 | 23 | 24 | 25 | 26 | 27 | 28 | 29 | 30 | 31 | 32 | 33 | 34 | 35 | 36 | 37 | 38 | 39 |
|                       | 71 | 5                                  | 6  | 7  | 8  | 9  | 10 | 11 | 12 | 13 | 14 | 15 | 16 | 17 | 18 | 19 | 20 | 21 | 22 | 23 | 24 | 25 | 26 | 27 | 28 | 29 | 30 | 31 | 32 | 33 | 34 | 35 | 36 | 37 | 38 |
|                       | 72 | 4                                  | 5  | 6  | 7  | 8  | 9  | 10 | 11 | 12 | 13 | 14 | 15 | 16 | 17 | 18 | 19 | 20 | 21 | 22 | 23 | 24 | 25 | 26 | 27 | 28 | 29 | 30 | 31 | 32 | 33 | 34 | 35 | 36 | 37 |
|                       | 73 | 3                                  | 4  | 5  | 6  | 7  | 8  | 9  | 10 | 11 | 12 | 13 | 14 | 15 | 16 | 17 | 18 | 19 | 20 | 21 | 22 | 23 | 24 | 25 | 26 | 27 | 28 | 29 | 30 | 31 | 32 | 33 | 34 | 35 | 36 |
|                       | 74 | 2                                  | 3  | 4  | 5  | 6  | 7  | 8  | 9  | 10 | 11 | 12 | 13 | 14 | 15 | 16 | 17 | 18 | 19 | 20 | 21 | 22 | 23 | 24 | 25 | 26 | 27 | 28 | 29 | 30 | 31 | 32 | 33 | 34 | 35 |
|                       | 75 | 1                                  | 2  | 3  | 4  | 5  | 6  | 7  | 8  | 9  | 10 | 11 | 12 | 13 | 14 | 15 | 16 | 17 | 18 | 19 | 20 | 21 | 22 | 23 | 24 | 25 | 26 | 27 | 28 | 29 | 30 | 31 | 32 | 33 | 34 |
|                       | 76 |                                    | 1  | 2  | 3  | 4  | 5  | 6  | 7  | 8  | 9  | 10 | 11 | 12 | 13 | 14 | 15 | 16 | 17 | 18 | 19 | 20 | 21 | 22 | 23 | 24 | 25 | 26 | 27 | 28 | 29 | 30 | 31 | 32 | 33 |
|                       | 77 |                                    |    | 1  | 2  | 3  | 4  | 5  | 6  | 7  | 8  | 9  | 10 | 11 | 12 | 13 | 14 | 15 | 16 | 17 | 18 | 19 | 20 | 21 | 22 | 23 | 24 | 25 | 26 | 27 | 28 | 29 | 30 | 31 | 32 |
|                       | 78 |                                    |    |    | 1  | 2  | 3  | 4  | 5  | 6  | 7  | 8  | 9  | 10 | 11 | 12 | 13 | 14 | 15 | 16 | 17 | 18 | 19 | 20 | 21 | 22 | 23 | 24 | 25 | 26 | 27 | 28 | 29 | 30 | 31 |
|                       | 79 |                                    |    |    |    | 1  | 2  | 3  | 4  | 5  | 6  | 7  | 8  | 9  | 10 | 11 | 12 | 13 | 14 | 15 | 16 | 17 | 18 | 19 | 20 | 21 | 22 | 23 | 24 | 25 | 26 | 27 | 28 | 29 | 30 |
|                       | 80 |                                    |    |    |    |    | 1  | 2  | 3  | 4  | 5  | 6  | 7  | 8  | 9  | 10 | 11 | 12 | 13 | 14 | 15 | 16 | 17 | 18 | 19 | 20 | 21 | 22 | 23 | 24 | 25 | 26 | 27 | 28 | 29 |

**Fig. S5: Birth cohorts included in the analysis of completed fertility.** Cells indicate the age of cohorts born 1961 to 1980 in calendar years 1976 to 2009. State-level unemployment rates are available starting in 1976, while conceptions are observed until 2009. Green cohorts ('61-'70) are included in Table 2. Blue cohorts ('71-'75) are added in columns (3) and (4) of Table S6. Purple cohorts ('76-'80) are added in column (5) of Table S6.

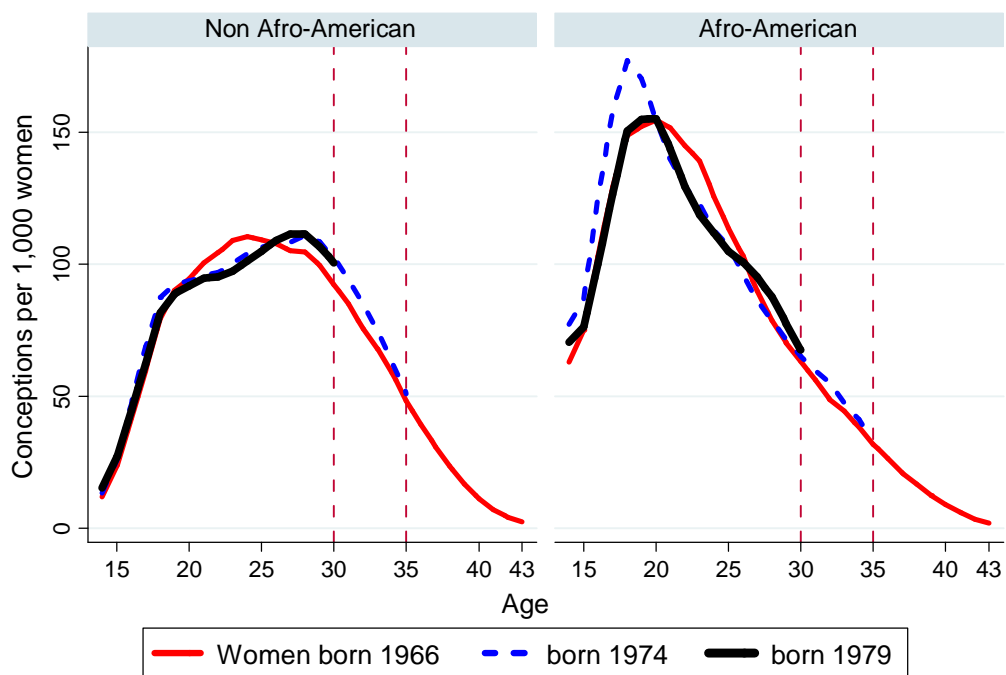

**Fig. S6: Fertility age profiles, by women's race and cohort.** Annual conception rates are plotted by age for three example birth cohorts, separated by race. Further comments as in Fig. S3.

**Fig. S7: Comparison of our completed fertility measures (based on Vital Statistics birth records) with standard estimates published biannually by the Census bureau.**

A

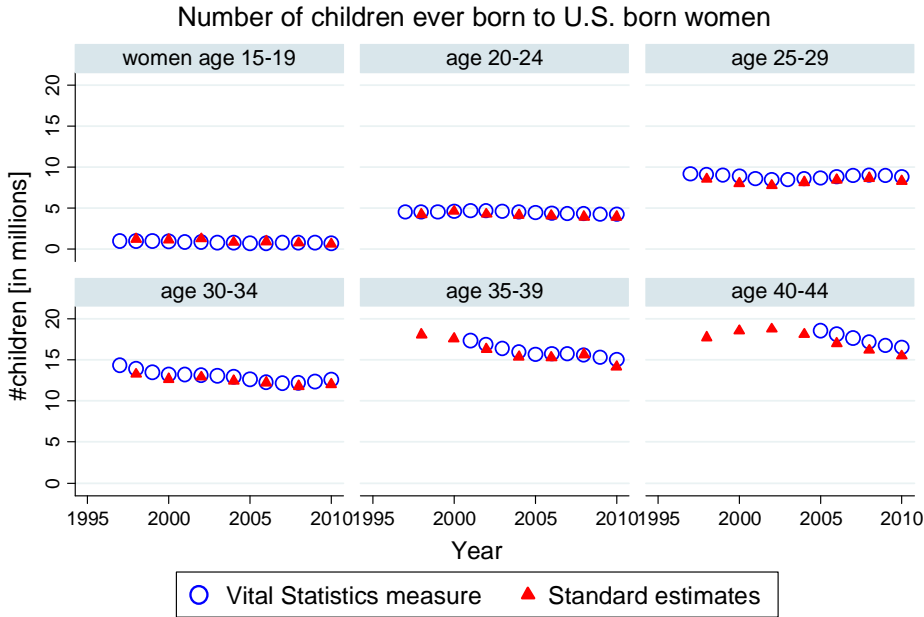

Notes: Standard estimates of completed fertility are published biannually by the U.S. Census Bureau (<http://www.census.gov/hhes/fertility/>), based on survey data collected by the American Community Survey, the Current Population Survey and the Survey of Income and Program Participation. Our Vital Statistics measure is based on the universe of births occurring after 1975. Cohorts of women who enter the fertile age range before 1975 are excluded (i.e. those aged 35-39 before year 2000, or aged 40-44 before year 2005). Here we focus on births rather than conceptions resulting in live births (as in the remainder of the paper) for better comparability with the Census estimates.

B

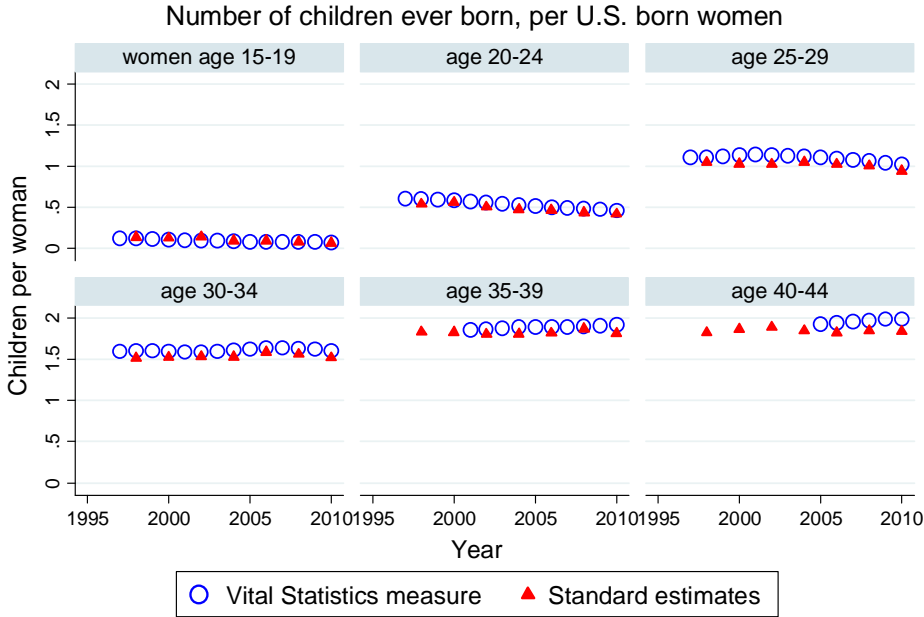

Notes: We construct the number of children ever born per woman the same way as the completed conception rate (see Materials and Methods), but with birth instead of conception counts. Further comments as in panel A.

C

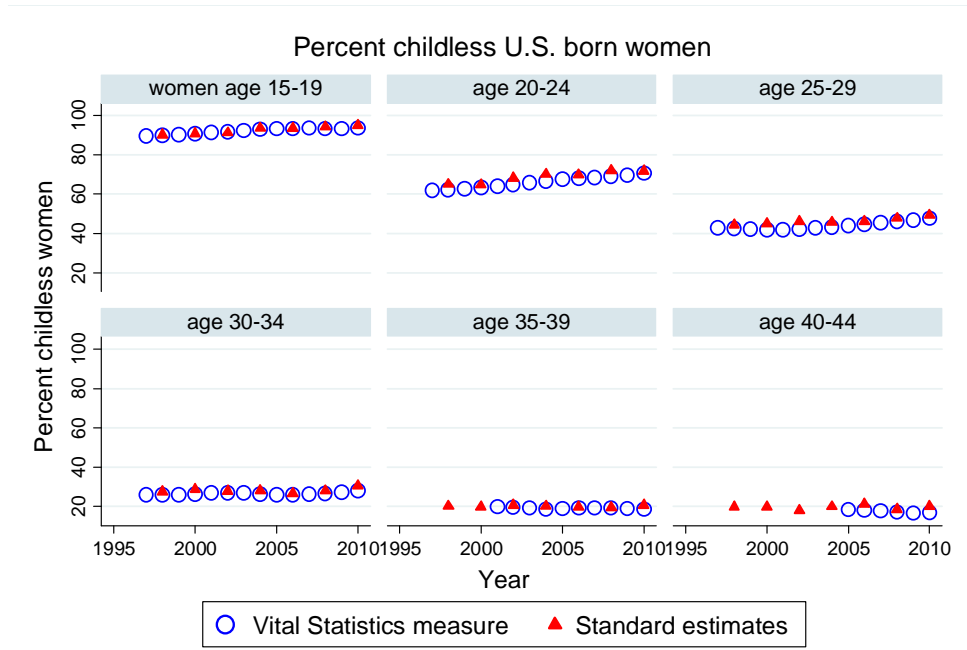

Notes: For the construction of the percent childless women using the Vital Statistics data see the Materials and Methods section. Further comments as in panel A.



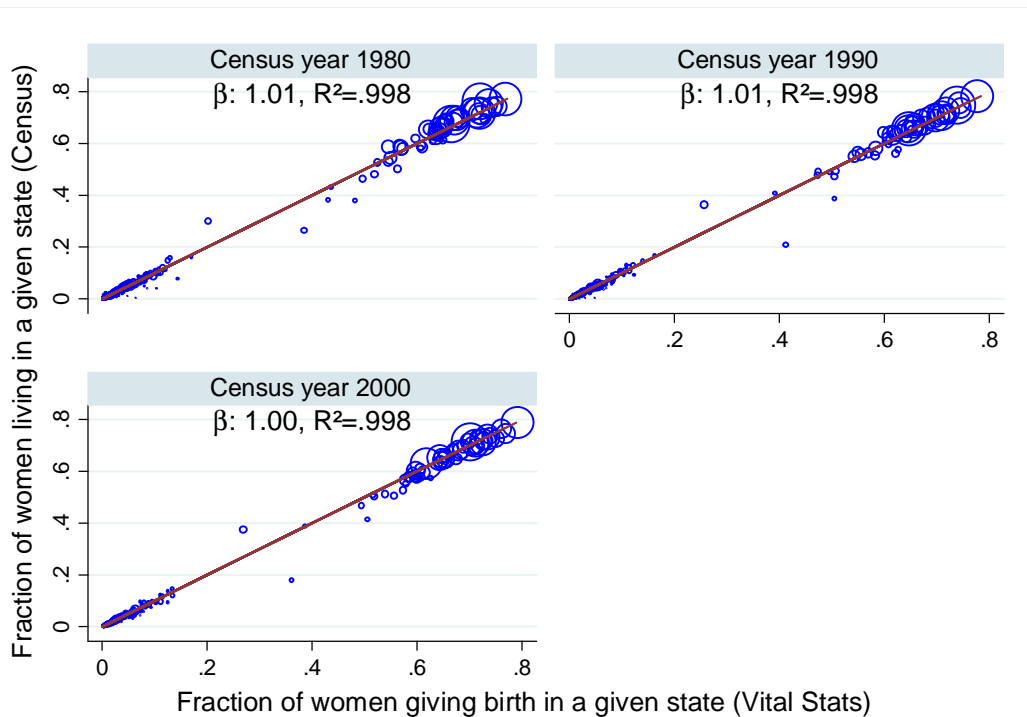

**Fig. S8: The fraction of women residing in a state from the Census vs. from Vital Statistics data.** Every circle represents the fraction of women born in one state X and giving birth / living in state Y (which might equal X). There are  $51 \times 51 = 2,601$  X-Y combinations. Circles are scaled by the number of women in each combination according to the Census estimate. Large circles at the top right of each figure represent X=Y combinations, i.e. the fractions of women who reside in their own birth state according to the Census and who give birth in their own birth state according to the Vital Statistics. Straight lines are fitted using OLS. The slope and the  $R^2$  are close to unity, which indicates that the state of residence pattern observed among women giving birth in the Vital Statistics is a good predictor of the overall state of residence pattern among women in the fertile age range that is observed in the Census. The two outliers in the .2-.4 range are women born in DC who live/give birth in DC and in Maryland, respectively. Our results do not change when we exclude DC born women from the analysis.

**Table S1: Short-run effect of the unemployment rate on the conception rate****A: All ages**

| Dep. var.:                                             | Dep. var. in first differences |                       | Dep. var. in levels   |
|--------------------------------------------------------|--------------------------------|-----------------------|-----------------------|
|                                                        | National level                 | State level           | State level           |
| Conception rate                                        | (1)                            | (2)                   | (3)                   |
| Change in unemployment rate                            | -0.480 ***<br>(0.144)          | -0.465 ***<br>(0.029) |                       |
| Unemployment rate                                      |                                |                       | -0.668 ***<br>(0.082) |
| Controls:                                              |                                |                       |                       |
| State FEs, time, time <sup>2</sup> , time <sup>3</sup> |                                |                       | Yes                   |
| N                                                      | 33                             | 1,683                 | 1,734                 |

**B: Age group-specific regressions (state level)**

| Dep. var.:                  | Age                   |                       |                       |                       |                       |                  |
|-----------------------------|-----------------------|-----------------------|-----------------------|-----------------------|-----------------------|------------------|
|                             | 15-19                 | 20-24                 | 25-29                 | 30-34                 | 35-39                 | 40-44            |
| Change in conception rate   | (1)                   | (2)                   | (3)                   | (4)                   | (5)                   | (6)              |
| Change in unemployment rate | -0.594 ***<br>(0.047) | -1.270 ***<br>(0.083) | -0.901 ***<br>(0.044) | -0.479 ***<br>(0.025) | -0.242 ***<br>(0.011) | 0.002<br>(0.004) |
| Average conception rate     | 64.94                 | 105.16                | 101.95                | 63.85                 | 22.83                 | 4.10             |
| Semi-elasticity             | -0.92%                | -1.21%                | -0.88%                | -0.75%                | -1.06%                | 0.04%            |
| N                           | 1,683                 | 1,683                 | 1,683                 | 1,683                 | 1,683                 | 1,683            |

Notes: Coefficients from OLS regressions of changes in the conception rate on changes in the overall unemployment rate are displayed. The data is aggregated by calendar year in (A) column 1, by calendar year and women's state of birth in (A) column 2, and by calendar year, women's state of birth and women's age group in (B). Hence state level regressions in (A) 2 and (B) refer to women's own state of birth. Changes refer to annual changes. The assigned unemployment rate is the weighted average unemployment rate across states where women give birth, with the number of births as weights. Standard errors in parenthesis are clustered by state of birth. Observations are weighted by cohort size. Significance levels: \*: $p < 0.1$ , \*\*  $p < 0.5$ ; \*\*\*  $p < 0.01$ .

**Table S2: Short-run effects over age groups, across different specifications**

| Dependent variable:                                                                    | Age                   |                       |                       |                       |                       |                       |
|----------------------------------------------------------------------------------------|-----------------------|-----------------------|-----------------------|-----------------------|-----------------------|-----------------------|
|                                                                                        | 15-19                 | 20-24                 | 25-29                 | 30-34                 | 35-39                 | 40-44                 |
| Conception rate                                                                        | (1)                   | (2)                   | (3)                   | (4)                   | (5)                   | (6)                   |
| (1) Levels specification with age, state, and cohort FEs                               |                       |                       |                       |                       |                       |                       |
| Unemployment rate                                                                      | -0.743 ***<br>(0.077) | -0.969 ***<br>(0.117) | -0.840 ***<br>(0.116) | -0.498 ***<br>(0.115) | -0.391 ***<br>(0.069) | -0.125 ***<br>(0.021) |
| (2) Levels specification with age and state FEs, and 3rd order time polynomial         |                       |                       |                       |                       |                       |                       |
| Unemployment rate                                                                      | -0.468 ***<br>(0.163) | -1.443 ***<br>(0.133) | -1.077 ***<br>(0.096) | -0.565 ***<br>(0.120) | -0.177 ***<br>(0.056) | 0.008<br>(0.015)      |
| (3) Levels specification with age, state and cohort FEs, and 3rd order time polynomial |                       |                       |                       |                       |                       |                       |
| Unemployment rate                                                                      | -0.615 ***<br>(0.099) | -1.203 ***<br>(0.141) | -1.117 ***<br>(0.095) | -0.510 ***<br>(0.128) | -0.067<br>(0.073)     | 0.006<br>(0.020)      |

Notes: The coefficients from regressions of the conception rate on the unemployment rate are displayed. Each coefficient is derived from a separate regression. For a graphical representation of these results see Fig. S3. Equation (IV) in the Methods section shows the regression model for specification (3).

**Table S3: Long-run effect of the unemployment rate at different ages on completed fertility, using the unemployment rate in women's own state of birth as an instrumental variable (2SLS regressions).**

| Dependent variable<br>Incl. cohorts '61-'70<br><b>2SLS</b> | Conceptions per 1000 women, prior to |                     |                     |                    |                    |
|------------------------------------------------------------|--------------------------------------|---------------------|---------------------|--------------------|--------------------|
|                                                            | age 40<br>(1)                        | age 35<br>(2)       | age 30<br>(3)       | age 25<br>(4)      | age 20<br>(5)      |
| Effect of average unemployment rate (instrumented) at      |                                      |                     |                     |                    |                    |
| Age 15-19                                                  | -5.29<br>(6.91)                      | -4.88<br>(6.29)     | -4.18<br>(5.39)     | -9.67***<br>(3.48) | -7.63***<br>(1.97) |
| Age 20-24                                                  | -13.81**<br>(5.48)                   | -14.82***<br>(5.30) | -14.45***<br>(5.02) | -7.86**<br>(3.80)  | 0.53<br>(2.18)     |
| Age 25-29                                                  | 5.02<br>(8.74)                       | 1.24<br>(6.42)      | 0.94<br>(4.56)      |                    |                    |
| Age 30-34                                                  | -2.47<br>(14.59)                     | -1.86<br>(14.27)    |                     |                    |                    |
| Age 35-39                                                  | -0.63<br>(11.57)                     |                     |                     |                    |                    |
| N                                                          | 510                                  | 510                 | 510                 | 510                | 510                |
| Mean dep. var.                                             | 1,916                                | 1,784               | 1,418               | 902                | 372                |

Notes: Coefficients from two-stage least squares (2SLS) regressions are displayed. The average unemployment rates in women's own state of birth at age 15-19, 20-24, ..., 35-39 are used as instruments for the average unemployment rate in the states where women give birth at age 15-19, 20-24, ..., 35-39. The Kleibergen-Paap F-statistic is always in excess of 10. All regressions include indicator variables for women's state and year of birth. Standard errors are shown in parenthesis and are clustered by state of birth. Observations are weighted by cohort size. See Materials and Methods for definitions of completed fertility rates. Significance levels: \*:p<0.1, \*\* p<0.5; \*\*\* p<0.01.

**Table S4: Long-run effect of the unemployment rate in women's own state of birth at different ages on completed fertility .**

| Dependent variable<br>Incl. cohorts '61-'70                                 | Conceptions per 1000 women, prior to |                     |                     |                   |                    |
|-----------------------------------------------------------------------------|--------------------------------------|---------------------|---------------------|-------------------|--------------------|
|                                                                             | age 40<br>(1)                        | age 35<br>(2)       | age 30<br>(3)       | age 25<br>(4)     | age 20<br>(5)      |
| Effect of average unemployment rate in women's <b>own state of birth</b> at |                                      |                     |                     |                   |                    |
| Age 15-19                                                                   | -4.22<br>(5.73)                      | -3.80<br>(5.28)     | -3.23<br>(4.51)     | -7.71**<br>(2.93) | -6.09***<br>(1.65) |
| Age 20-24                                                                   | -10.18**<br>(4.03)                   | -10.88***<br>(4.00) | -10.63***<br>(3.87) | -5.74**<br>(2.96) | 0.45<br>(1.70)     |
| Age 25-29                                                                   | 3.73<br>(5.81)                       | 1.16<br>(4.49)      | 0.91<br>(3.31)      |                   |                    |
| Age 30-34                                                                   | -1.59<br>(9.24)                      | -1.11<br>(9.13)     |                     |                   |                    |
| Age 35-39                                                                   | -0.34<br>(6.82)                      |                     |                     |                   |                    |
| N                                                                           | 510                                  | 510                 | 510                 | 510               | 510                |
| Mean dep. var.                                                              | 1,916                                | 1,784               | 1,418               | 902               | 372                |

Notes: Coefficients from OLS regressions of completed fertility on the average unemployment rate at different periods of women's fertile lifecycle are displayed. The data is aggregated by women's state and year of birth. All regressions include indicator variables for women's state and year of birth. The unemployment rate refers to the unemployment rate in women's own state of birth. Standard errors in are shown in parenthesis and are clustered by state of birth. Observations are weighted by cohort size. See Fig. S4 for an illustration of the included birth cohorts and Materials and Methods for definitions of completed fertility rates. Significance levels: \*:p<0.1, \*\* p<0.5; \*\*\* p<0.01.

**Table S5: Long-run effect of the unemployment rate at different ages on completed fertility for non African-American women**

| Dependent variable<br>Incl. cohorts '61-'70 | Conceptions per 1000 non African-American women, prior to |                    |                   |                 |                   |
|---------------------------------------------|-----------------------------------------------------------|--------------------|-------------------|-----------------|-------------------|
|                                             | age 40<br>(1)                                             | age 35<br>(2)      | age 30<br>(3)     | age 25<br>(4)   | age 20<br>(5)     |
| Effect of average unemployment rate at      |                                                           |                    |                   |                 |                   |
| Age 15-19                                   | -1.88<br>(8.59)                                           | -0.84<br>(7.74)    | 1.43<br>(6.67)    | -6.11<br>(4.18) | -4.61**<br>(2.11) |
| Age 20-24                                   | -12.91*<br>(7.01)                                         | -13.50**<br>(6.65) | -11.69*<br>(6.37) | -4.23<br>(4.34) | 2.58<br>(2.10)    |
| Age 25-29                                   | 6.29<br>(11.16)                                           | 3.11<br>(7.47)     | 5.39<br>(6.10)    |                 |                   |
| Age 30-34                                   | -8.61<br>(17.66)                                          | -7.06<br>(16.45)   |                   |                 |                   |
| Age 35-39                                   | -1.23<br>(15.90)                                          |                    |                   |                 |                   |
| N                                           | 510                                                       | 510                | 510               | 510             | 510               |
| Mean dep. var.                              | 1,869                                                     | 1,716              | 1,345             | 818             | 306               |

Notes: Coefficients from regressions using completed fertility for non African-American women (i.e. children ever born to non A-A women, per 1,000 A-A women) are displayed. Significance levels: \*:p<0.1, \*\* p<0.5; \*\*\* p<0.01. Further comments as in Table 2.

**Table S6: Long-run effect of the unemployment rate at different ages on completed fertility across different cohorts.**

| Dependent variable                     | Number of conceptions per 1000 women prior to |                    |                     |                     |                     |
|----------------------------------------|-----------------------------------------------|--------------------|---------------------|---------------------|---------------------|
|                                        | age 40                                        | age 35             |                     | age 30              |                     |
| Incl. cohorts                          | '61-'70                                       | '61-'70            | '61-'75             | '61-'75             | '61-'80             |
|                                        | (1)                                           | (2)                | (3)                 | (4)                 | (5)                 |
| Effect of average unemployment rate at |                                               |                    |                     |                     |                     |
| Age 15-19                              | -5.07<br>(7.60)                               | -4.83<br>(6.94)    | -2.29<br>(5.67)     | -4.43<br>(5.28)     | -2.28<br>(3.79)     |
| Age 20-24                              | -14.21**<br>(6.02)                            | -15.35**<br>(5.84) | -12.52***<br>(4.21) | -15.89***<br>(4.06) | -15.21***<br>(3.63) |
| Age 25-29                              | 5.41<br>(9.68)                                | 1.27<br>(6.97)     | 7.43<br>(6.58)      | 2.18<br>(4.99)      | 5.16<br>(6.09)      |
| Age 30-34                              | -5.23<br>(16.30)                              | -4.44<br>(16.03)   | 7.95<br>(11.37)     |                     |                     |
| Age 35-39                              | 0.40<br>(12.83)                               |                    |                     |                     |                     |
| N                                      | 510                                           | 510                | 765                 | 765                 | 1,020               |
| Mean dep. var.                         | 1,916                                         | 1,775              | 1,784               | 1,419               | 1,417               |

Notes: Coefficients from OLS regressions of completed fertility on the average unemployment rate at different periods of women's fertile lifecycles are displayed. The data is aggregated by women's state and year of birth, hence only U.S. born women are included. All regressions include indicator variables for women's state and year of birth. The unemployment rate refers to the weighted average unemployment rate across states where women from the relevant cohort gave birth, with the number of births as weights. Standard errors are shown in parenthesis and are clustered by state of birth. Observations are weighted by cohort size. See Fig. S4 for an illustration of the included birth cohorts and Materials and Methods for definitions of completed fertility rates. Significance levels: \*:p<0.1, \*\* p<0.5; \*\*\* p<0.01.

**Table S7: Long-run effect of the unemployment rate at different ages on the percent of childless non African-American women**

| Dependent variable<br>Incl. cohorts '61-'70 | Percent childless non African-American women at |                   |                   |                  |                   |
|---------------------------------------------|-------------------------------------------------|-------------------|-------------------|------------------|-------------------|
|                                             | age 40<br>(1)                                   | age 35<br>(2)     | age 30<br>(3)     | age 25<br>(4)    | age 20<br>(5)     |
| Effect of average unemployment rate at      |                                                 |                   |                   |                  |                   |
| Age 15-19                                   | 0.34<br>(0.30)                                  | 0.29<br>(0.28)    | 0.08<br>(0.25)    | 0.35*<br>(0.18)  | 0.44***<br>(0.12) |
| Age 20-24                                   | 0.57**<br>(0.23)                                | 0.59***<br>(0.21) | 0.69***<br>(0.23) | 0.43**<br>(0.19) | -0.07<br>(0.12)   |
| Age 25-29                                   | -0.06<br>(0.40)                                 | 0.05<br>(0.31)    | 0.05<br>(0.23)    |                  |                   |
| Age 30-34                                   | 0.49<br>(0.57)                                  | 0.37<br>(0.52)    |                   |                  |                   |
| Age 35-39                                   | 0.09<br>(0.58)                                  |                   |                   |                  |                   |
| N                                           | 510                                             | 510               | 510               | 510              | 510               |
| Mean dep. var.                              | 19.22                                           | 22.81             | 33.03             | 52.89            | 76.95             |



**Table S8: Long-run effect of the unemployment rate at different ages on the percent of childless women across different cohorts.**

| Dependent variable                     | Percent of childless women at |                   |                  |                   |                   |
|----------------------------------------|-------------------------------|-------------------|------------------|-------------------|-------------------|
|                                        | age 40                        | age 35            |                  | age 30            |                   |
| Incl. cohorts                          | '61-'70                       | '61-'70           | '61-'75          | '61-'75           | '61-'80           |
|                                        | (1)                           | (2)               | (3)              | (4)               | (5)               |
| Effect of average unemployment rate at |                               |                   |                  |                   |                   |
| Age 15-19                              | 0.34<br>(0.25)                | 0.33<br>(0.24)    | 0.13<br>(0.18)   | 0.14<br>(0.19)    | 0.06<br>(0.12)    |
| Age 20-24                              | 0.51**<br>(0.20)              | 0.55***<br>(0.18) | 0.37**<br>(0.14) | 0.72***<br>(0.14) | 0.66***<br>(0.14) |
| Age 25-29                              | -0.06<br>(0.33)               | 0.09<br>(0.28)    | -0.23<br>(0.23)  | -0.03<br>(0.19)   | -0.17<br>(0.20)   |
| Age 30-34                              | 0.27<br>(0.54)                | 0.20<br>(0.53)    | -0.33<br>(0.32)  |                   |                   |
| Age 35-39                              | -0.01<br>(0.46)               |                   |                  |                   |                   |
| N                                      | 510                           | 510               | 765              | 765               | 1,020             |
| Mean dep. var.                         | 18.44                         | 21.55             | 21.53            | 31.28             | 31.82             |

Notes: Coefficients from OLS regressions of the percent of childless women on the average unemployment rate at different periods of women's fertile lifecycles are displayed. See notes under Table 2 for further explanations. Significance levels: \*:p<0.1, \*\* p<0.5; \*\*\* p<0.01.

**Table S9: Long-term effect on maternal composition and health at birth**

| Dependent variable<br>(prior to age 40) | Average age<br>at conception | Percent African-<br>American mothers | Percent low birth weight babies |                    |                 |
|-----------------------------------------|------------------------------|--------------------------------------|---------------------------------|--------------------|-----------------|
|                                         | (1)                          | (2)                                  | (3)                             | (4)                | (5)             |
| Effect of average unemployment rate at  |                              |                                      |                                 |                    |                 |
| Age 15-19                               | 0.05***<br>(0.02)            | -0.84**<br>(0.32)                    | -0.08***<br>(0.02)              | -0.06***<br>(0.02) | -0.01<br>(0.02) |
| Age 20-24                               | 0.03<br>(0.02)               | -0.33<br>(0.33)                      | -0.04*<br>(0.02)                | -0.02<br>(0.02)    | -0.01<br>(0.02) |
| Age 25-29                               | 0.06*<br>(0.03)              | -0.55<br>(0.65)                      | -0.10**<br>(0.05)               | -0.08**<br>(0.04)  | -0.05<br>(0.04) |
| Age 30-34                               | 0.10*<br>(0.05)              | -0.95<br>(0.66)                      | -0.06<br>(0.06)                 | -0.02<br>(0.05)    | 0.02<br>(0.04)  |
| Age 35-39                               | 0.06<br>(0.04)               | -0.15<br>(0.82)                      | -0.07<br>(0.06)                 | -0.04<br>(0.05)    | -0.06<br>(0.05) |
| Controls:                               |                              |                                      |                                 |                    |                 |
| Maternal age, gender, parity            |                              |                                      |                                 | Yes                |                 |
| Fraction African-American mothers       |                              |                                      |                                 |                    | Yes             |
| N                                       | 510                          | 510                                  | 510                             | 510                | 510             |
| Mean dep. var.                          | 25.36                        | 16.80                                |                                 | 6.11               |                 |

Notes: As in previous regressions the data is aggregated by women's own state of birth and year of birth. All birth cohorts from 1961-1970 are included. The dependent variable in column (1) is women's age at conception averaged across all conceptions in a cohort prior to age 40; in column (2) the percent of all mothers in a cohort that are African-American; in column (3) to (5) the percent of all babies conceived in a cohort prior to age 40 that are low birth weight (<2500g). The unemployment rate refers to the weighted average unemployment rate across states where women in a particular year of birth and state of birth cohorts subsequently gave birth, with the number of births as weights. All regressions include indicator variables for women's state and year of birth. Standard errors are shown in parenthesis and are clustered by state of birth. Significance levels: \*:p<0.1, \*\* p<0.5; \*\*\* p<0.01.

**Table S10: Long-term effect on socio-economic outcomes**

| Dependent variable<br>(at age 39)      | Percent women<br>never married<br>(1) | Years of<br>education<br>(2) | Log family<br>income<br>(5) |
|----------------------------------------|---------------------------------------|------------------------------|-----------------------------|
| Effect of average unemployment rate at |                                       |                              |                             |
| Age 15-19                              | -0.04<br>(0.28)                       | -0.022<br>(0.017)            | 0.017<br>(0.011)            |
| Age 20-24                              | 0.64**<br>(0.24)                      | -0.004<br>(0.017)            | 0.006<br>(0.013)            |
| Age 25-29                              | -0.17<br>(0.50)                       | -0.012<br>(0.035)            | 0.034<br>(0.024)            |
| Age 30-34                              | -0.49<br>(0.50)                       | 0.050<br>(0.045)             | 0.002<br>(0.022)            |
| Age 35-39                              | 0.12<br>(0.66)                        | -0.043<br>(0.050)            | -0.035<br>(0.024)           |
| N                                      | 510                                   | 510                          | 510                         |
| Mean dep. var.                         | 15.84                                 | 13.47                        | 10.73                       |

Notes: As in previous regressions the data is aggregated by women's own state of birth and year of birth. All birth cohorts from 1961-1970 are included. The data is obtained from the 2000 Census and the 2001-2009 American Community Survey (ACS). Women's state of birth is reported in the ACS which allows us to replicate the specification used for the analysis of completed fertility. The unemployment rate refers to the weighted average unemployment rate across states where women in a particular year of birth and state of birth cohorts subsequently gave birth, with the number of births as weights. All regressions include indicator variables for women's state and year of birth. Standard errors are shown in parenthesis and are clustered by state of birth. Observations are weighted by cohort size as reported in the Census/ACS. Significance levels: \*: $p < 0.1$ , \*\*  $p < 0.05$ ; \*\*\*  $p < 0.01$ .
